# Supplementary material for: Construction of hierarchical CoS nanowire@NiCo2S4 nanosheet arrays via one-step ion exchange for high-performance supercapacitors
Source: Royal Society of Chemistry journal article supplement (doi:10.1039/c5ta05934h), 2015-01-01
Supplement: c5ta05934h1.pdf [file c5ta05934h1.pdf]

## Supporting Information

### Construction of hierarchical CoS nanowire @NiCo<sub>2</sub>S<sub>4</sub> nanosheet arrays via one-step ion exchange for high-performance supercapacitors

Figure S1

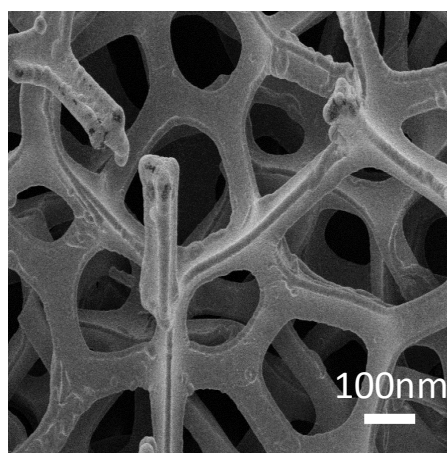

Figure S1. SEM image of bare Ni foam.

Figure S2

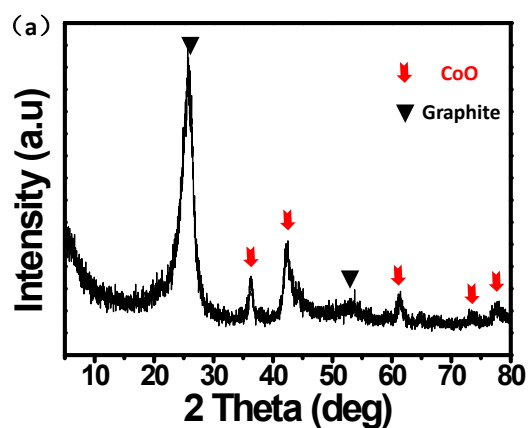

Figure S1. XRD patterns of the CoO NWAs.

**Figure S3**

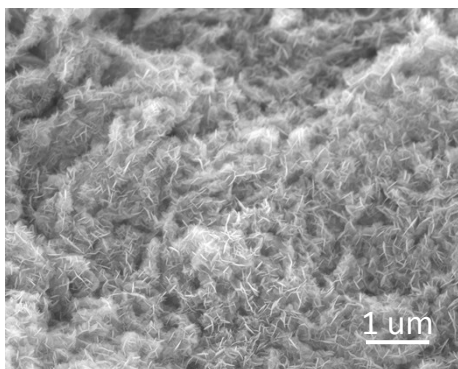

**Figure S3.** SEM image of CoS@NiCo<sub>2</sub>S<sub>4</sub> NWSAs after 3000 cycles.
